# Supplementary material
Source: MDPI journal article supplement (https://www.mdpi.com/2227-9717/7/2/97)
Supplement: s1 [file s1]

Archive with 9 entries (9 files):
- Supplementary Material/additionalfile1.pdf
- Supplementary Material/Supplementaryfigure1.jpg
- Supplementary Material/SupplementaryFigure2.eps
- Supplementary Material/SupplementaryFigure3.eps
- Supplementary Material/Supplementaryfigure4.jpg
- Supplementary Material/SupplementaryFigure5.eps
- Supplementary Material/SupplementaryFigure6.eps
- Supplementary Material/SupplementaryFigure7.eps
- Supplementary Material/SupplementaryFigure8.jpg
