# Supplementary material
Source: MDPI journal article supplement (https://www.mdpi.com/2227-9717/7/2/97)

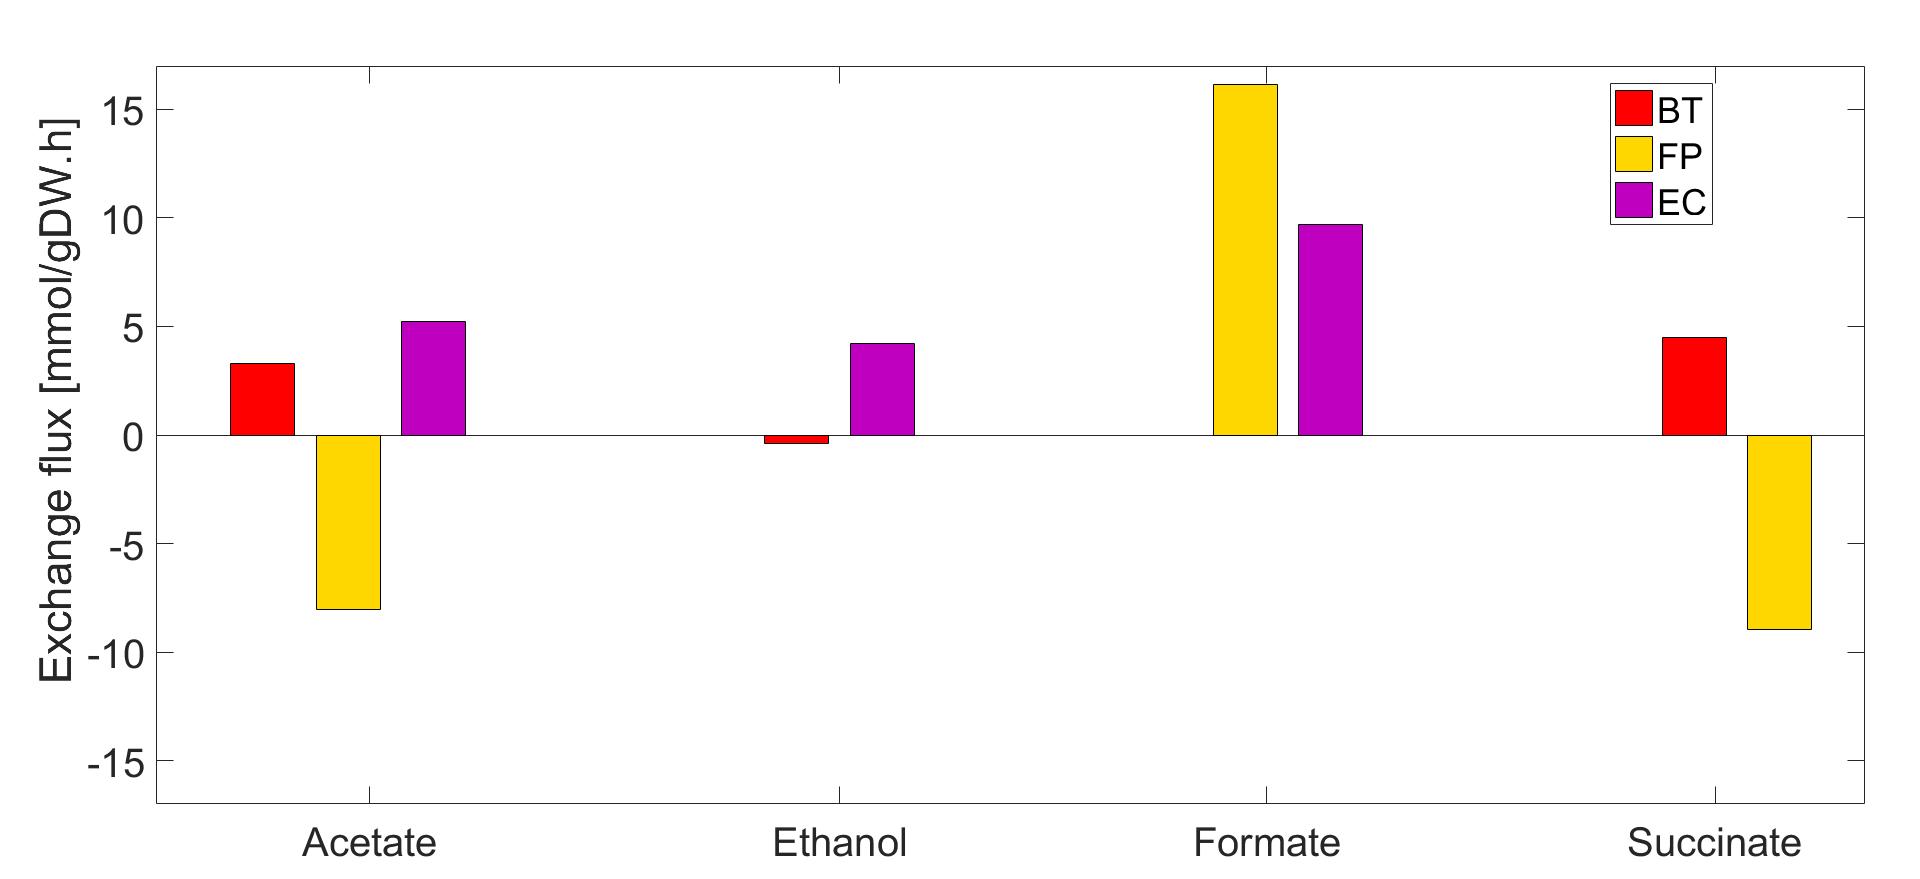

Supplement: s1 [file s1 › Supplementary Material/Supplementaryfigure1.jpg]

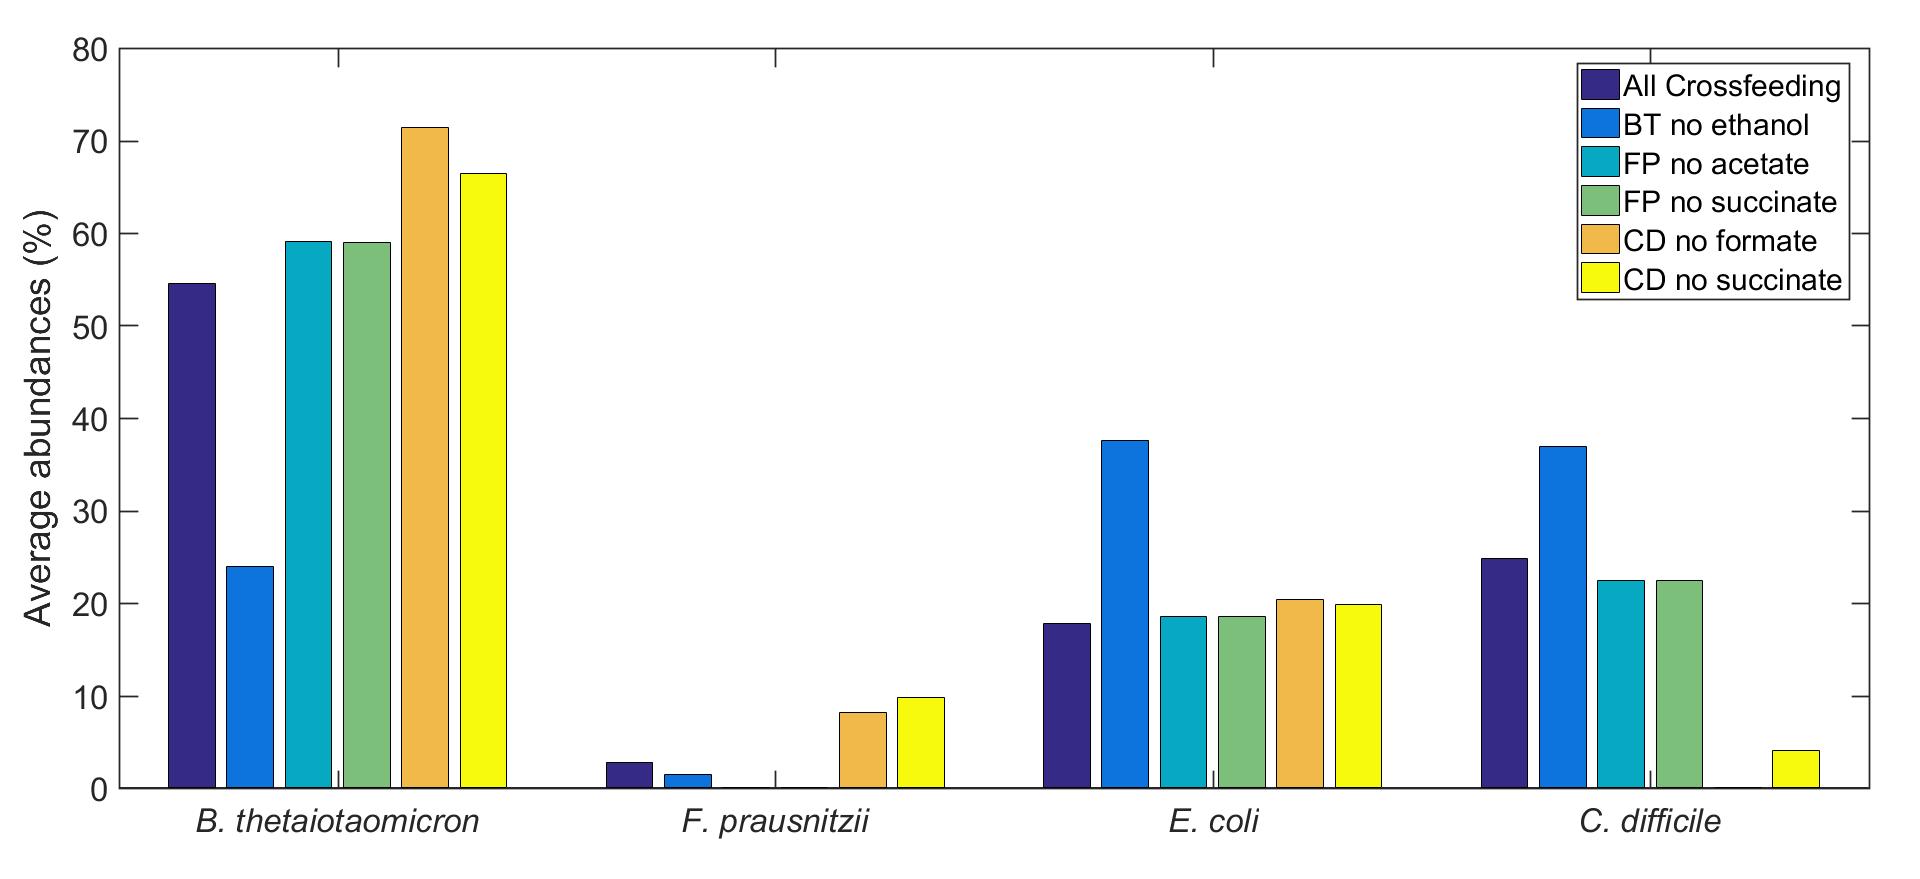

Supplement: s1 [file s1 › Supplementary Material/Supplementaryfigure4.jpg]
